# Supplementary material
Source: MDPI journal article supplement (https://www.mdpi.com/2073-4441/11/5/878)
Supplement: s1 [file s1]

## Sheet: Figure S1. Qvs Qs
The relationship between discharge (Q) and suspended sediments transport rate (Qs)
(a) Violettes
(b) Moulinet
(c) Incline Creek
(d) Galabre
(e) Owenabue
(f) Bandon
(g) Bès
(h) Ribera Salada
(i) Isabena
(j) Carapelle
(k) Meuse

## Sheet: Figure S2. Background line
Background line for falling limb of flood events in each catchment during calibration period
(a) Violettes
(b) Moulinet
(c) Incline Creek
(d) Galabre
(e) Owenabue
(f) Bandon
(g) Bès
(h) Ribera Salada
(i) Isabena
(j) Carapelle
(k) Meuse

## Sheet: Figure S4. Sensitivity analysis
Model sensitivity to filtration and scour parameters using contours of RSR
(a) Violettes
(b) Moulinet
(c) Incline Creek
(d) Galabre
(e) Owenabue
(f) Bandon
(g) Bès
(h) Ribera Salada
(i) Isabena
(j) Carapelle
(k) Meuse

## Sheet: Figure S5. Model calibration
Model calibration output in multiple catchments
(a) Violettes
(b) Moulinet
(c) Incline Creek
(d) Galabre
(e) Bès
(f) Ribera Salada
(g) Isabena
(h) Carapelle
(i) Meuse

## Sheet: Table S1. Study sites
Coordinates of study sites
No	Site	Nation	Decimal Degrees
			Latitude	longitude
1	Violettes	France	48.63583333 N	1.13805556 E
2	Moulinet	France	48.61638889 N	1.18888889 E
3	Incline Creek	Nevada, USA.	39.25888889 N	119.92222222 W
4	Galabre	France	44.1744643 N	6.2186791 E
5	Owenabue	Ireland	51.822 N	8.422 W
6	Bandon	Ireland	51.766 N	8.682 W
7	Bès	France	44.2171777 N	6.2757954 E
8	Ribera Salada	Spain	42.0641 N	1.4315 E
9	Isabena	Spain	42.195 N	0.396667 E
10	Carapelle	Southern Italy	41.2973459 N	15.6007032 E
11	Hopland	California, USA.	39.02666667 N	123.13777778 W
12	Guerneville	California, USA.	38.50861111 N	122.92666667 W
13	Meuse	Belgian-Dutch border	50.757435 N	5.682616 E
